# Supplementary material for: Flow-induced voltage generation by driving imidazolium-based ionic liquids over a graphene nano-channel
Source: Royal Society of Chemistry journal article supplement (doi:10.1039/c8ta02629g), 2018-01-01
Supplement: c8ta02629g1.pdf [file c8ta02629g1.pdf]

## Supplementary Information

### Flow-induced Voltage Generation by Driving Imidazolium-Based Ionic Liquids over a Graphene Nano-Channel

Yongji Guan,<sup>a</sup> Qunfeng Shao,<sup>c</sup> Wenqiong Chen,<sup>a</sup> Jiao Zhang,<sup>a</sup> Xiaoping Zhang<sup>\*a</sup> and Youquan Deng<sup>\*b</sup>

<sup>a</sup>*Institute of Optoelectronics and Electromagnetic Information, School of Information Science and Engineering, Lanzhou University, Lanzhou, 730000, People's Republic of China. E-mail: zxp@lzu.edu.cn*

<sup>b</sup>*Centre for Green Chemistry and Catalysis, Lanzhou Institute of Chemical Physics, Chinese Academy of Sciences, Lanzhou, 730000, People's Republic of China. E-mail: ydeng@licp.cas.cn*

<sup>c</sup>*Department of Electronic and Information Engineering, School of Information Science and Engineering, Shenyang University of Technology, Shenyang, 110870, People's Republic of China.*

Fig. S1 presents the variation of total energy of the simulation system consists of [Emim][BF<sub>4</sub>] and graphene nano-channel with relaxation time steps. From Fig. S1, we can find the total energy of the simulation gradually decreases with the increasing of the simulation times then converges to a constant. So the simulation system can be regarded as reaching the equilibration.

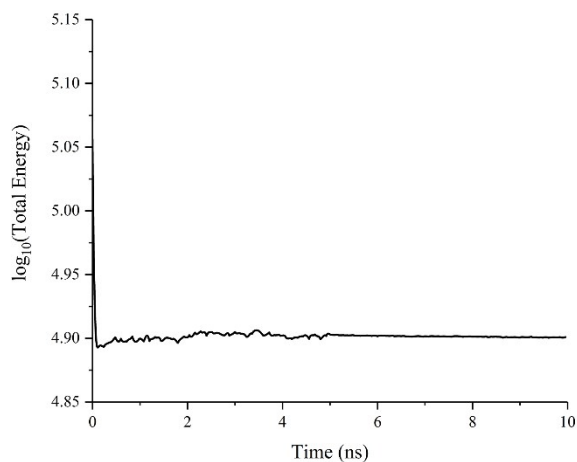

Fig S1. The variation of total energy of the simulation system consists of [Emim][BF<sub>4</sub>] and graphene nano-channel with relaxation time steps.

After the system reached the equilibration, to observe the spatial distribution of ions in x and y direction, we calculate the mean number density of ILs, cations and anions, plotted in Fig. S2. Clearly, the mean number of ILs fluctuates across a fixed value and no distinct layers occur close to graphene surfaces. It is not taking the ions distribution of ILs in x and y direction into consideration when calculating the flow induced voltage.

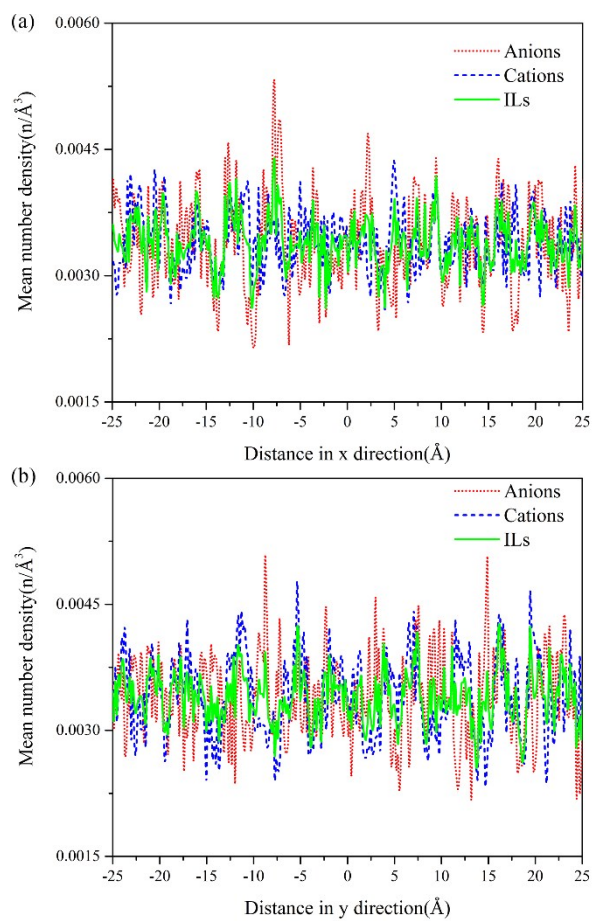

Fig S2. The mean number density of ILs, cations and anions in (a) x direction and (b) y direction: red shot dot line is anions, blue shot dash line is cations and green solid line is ILs.
